# Supplementary material for: Nanoparticle-Mediated Physical Exfoliation of Aqueous-Phase Graphene for Fabrication of Three-Dimensionally Structured Hybrid Electrodes
Source: PubMed Central journal article supplement (PMC4728443; doi:10.1038/srep19761), 2016-01-27
Supplement: srep19761-s1.pdf [file srep19761-s1.pdf]

*Supplementary Information*

# Nanoparticle-Mediated Physical Exfoliation of Aqueous-Phase Graphene for Fabrication of Three-Dimensionally Structured Hybrid Electrodes

Younghee Lee,<sup>b</sup> Hojin Choi,<sup>b</sup> Min-Sik Kim,<sup>b</sup> Seonmyeong Noh,<sup>b</sup> Ki-Jin Ahn,<sup>b</sup> Kyungun Im,<sup>b</sup>  
Oh Seok Kwon,<sup>c,\*</sup> and Hyeonseok Yoon<sup>a,b,\*</sup>

<sup>a</sup>Alan G. MacDiarmid Energy Research Institute, School of Polymer Science and Engineering, Chonnam National University, 77 Yongbong-ro, Buk-gu, Gwangju 500-757, South Korea.  
E-mail: hyoon@chonnam.ac.kr; Tel: +82-62-530-1778; Fax: +82-62-530-1779

<sup>b</sup>Department of Polymer Engineering, Graduate School, Chonnam National University, 77 Yongbong-ro, Buk-gu, Gwangju 500-757, South Korea.

<sup>c</sup>BioNanotechnology Research Center, Korea Research Institute of Bioscience and Biotechnology, 125 Gwahak-ro, Yuseong-gu, Daejeon 305-806, South Korea.  
E-mail: oskwon7799@gmail.com; Tel: +82-42-879-8462; Fax: +82-42-879-8594

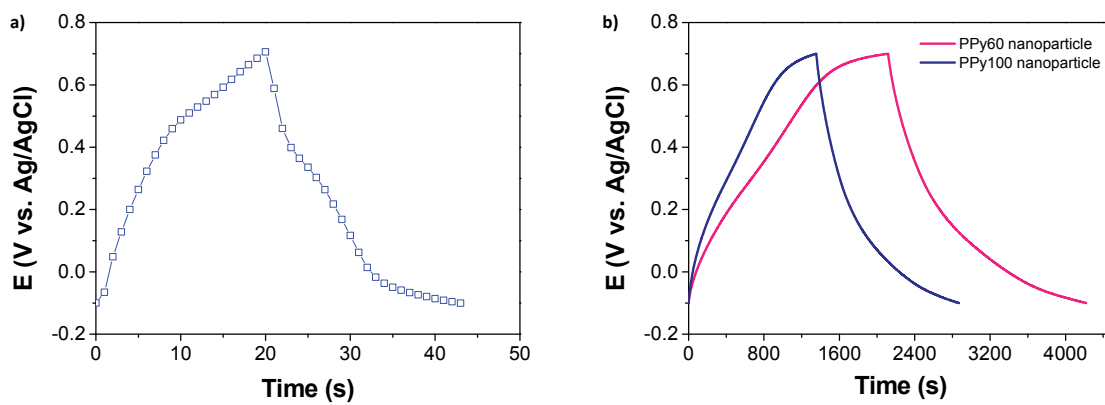

Figure S1. Representative galvanostatic charge/discharge curves of the controls recorded at  $0.1 \text{ A g}^{-1}$  current density: (a) graphite precursor (exfoliated graphite) and (b) PPy nanospheres.

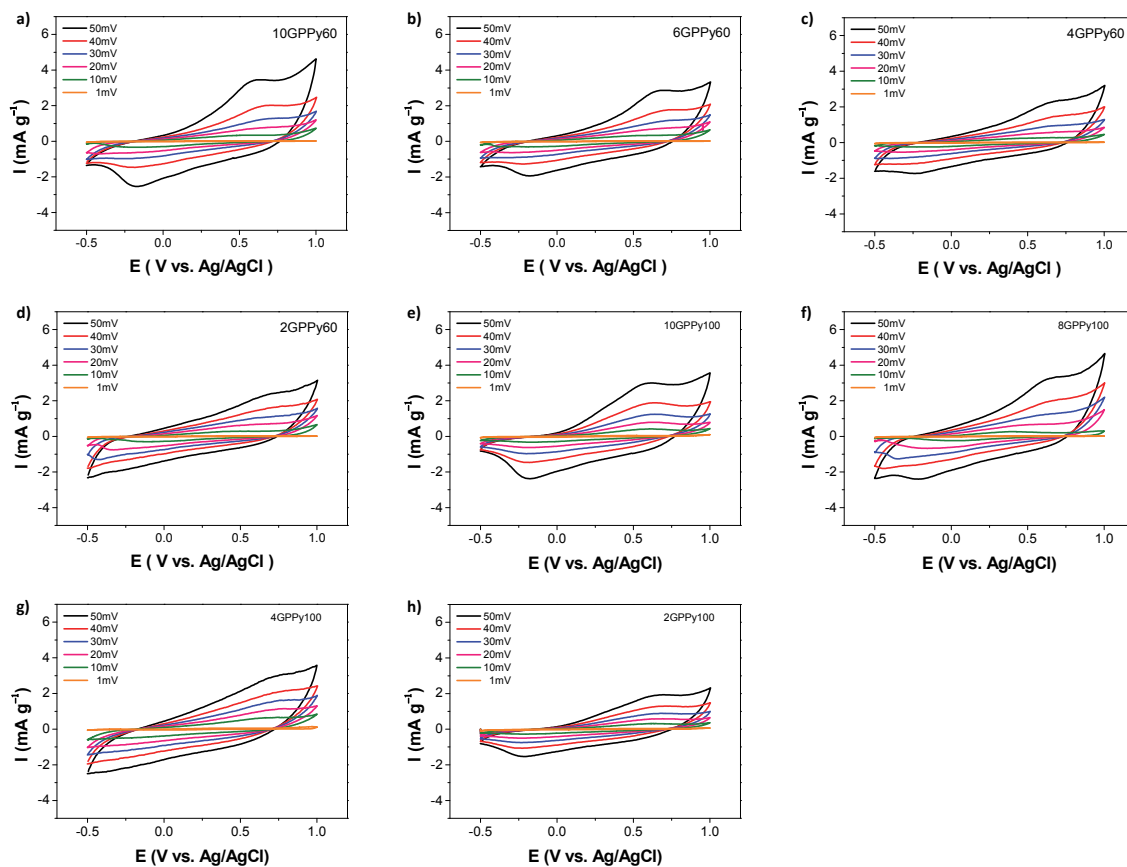

Figure S2. CV curves of (a-d) GPPy60 and (e-h) GPPy100 samples with different PPy-to-graphite weight ratios at scan rates ranging from 1–50  $\text{mV s}^{-1}$ : (a) 10:1, (b) 6:1, (c) 4:1 and (d) 2:1; (e) 10:1, (f) 6:1, (g) 4:1 and (h) 2:1.

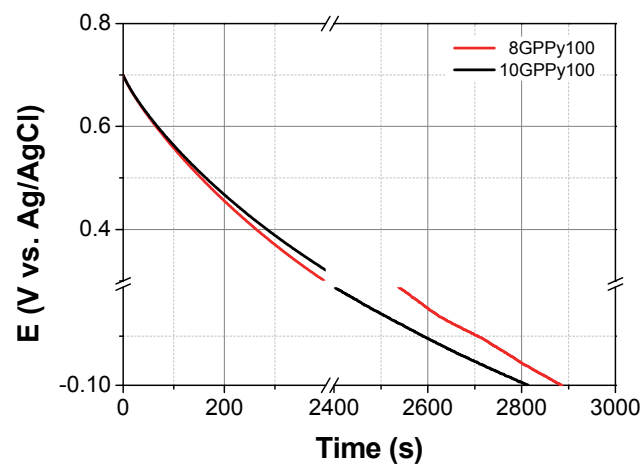

Figure S3. Discharge curves of 8GPPy100 and 10GPPy100.

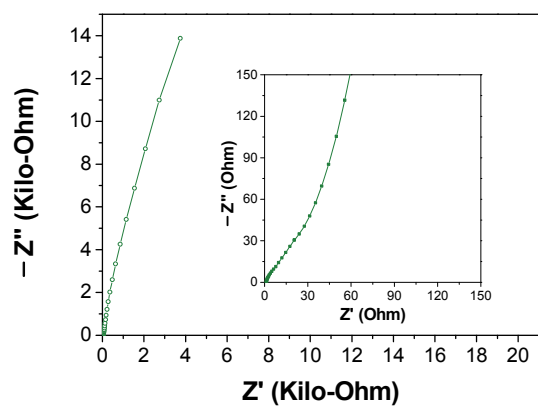

Figure S4. (a) EIS Nyquist plot of pre-exfoliated graphite measured at the same condition as a control.

Table S1. Parameters calculated from EIS measurements using equivalent circuit presented in Figure 6c.

| Sample                       | $R_1$<br>( $\Omega$ ) | $R_2$<br>( $\Omega$ ) | $C_1$<br>( $\mu\text{F}$ ) | CPE<br>(mMho)         |
|------------------------------|-----------------------|-----------------------|----------------------------|-----------------------|
| Graphite<br>(pre-exfoliated) | 1.15                  | 31.0                  | 5.6                        | $98.7 \times 10^{-3}$ |
| 2GPPy60                      | 1.18                  | 16.9                  | 11.6                       | 14.1                  |
| 4GPPy60                      | 1.14                  | 6.9                   | 15.6                       | 17.1                  |
| 6GPPy60                      | 1.17                  | 5.1                   | 17.9                       | 17.2                  |
| 8GPPy60                      | 1.18                  | 1.4                   | 20.4                       | 33.5                  |
| 10GPPy60                     | 1.17                  | 1.7                   | 18.9                       | 31.7                  |
| 2GPPy100                     | 1.13                  | 22.4                  | 11.5                       | 13.8                  |
| 4GPPy100                     | 1.19                  | 11.5                  | 12.4                       | 14.3                  |
| 6GPPy100                     | 1.10                  | 8.5                   | 17.2                       | 16.0                  |
| 8GPPy100                     | 1.13                  | 2.9                   | 20.1                       | 20.1                  |
| 10GPPy100                    | 1.19                  | 4.2                   | 17.6                       | 18.0                  |

Table S2. Elemental analysis data of GPPy nanohybrids.\*

| Sample    | Atom weight (wt%) |        |       |   | PPy-to-graphene weight ratio |
|-----------|-------------------|--------|-------|---|------------------------------|
|           | N                 | C      | H     | S |                              |
| 2GPPy60   | 9.917             | 66.541 | 4.143 | 0 | 2.1                          |
| 4GPPy60   | 11.566            | 60.512 | 4.471 | 0 | 3.8                          |
| 6GPPy60   | 12.036            | 57.868 | 4.777 | 0 | 5.0                          |
| 8GPPY60   | 12.242            | 57.511 | 4.859 | 0 | 5.4                          |
| 10GPPy60  | 12.273            | 57.183 | 4.774 | 0 | 5.5                          |
| 2GPPy100  | 10.720            | 64.388 | 3.934 | 0 | 2.6                          |
| 4GPPy100  | 12.104            | 59.764 | 4.470 | 0 | 4.5                          |
| 6GPPy100  | 12.274            | 58.494 | 4.705 | 0 | 5.1                          |
| 8GPPY100  | 12.495            | 58.317 | 4.660 | 0 | 5.5                          |
| 10GPPy100 | 12.519            | 57.472 | 4.725 | 0 | 5.9                          |

\*Thermo Scientific FLASH 2000 CHNS/O analyzer was used.

*Assumptions* for calculating the packing density of the nanohybrids:

1) At the 10:1 PPy-to-graphite weight ratio, the graphene surface coverage of 60-nm-diameter nanospheres reaches to 100% while that of 100-nm-diameter nanospheres reaches to 90%. The different surface coverage of the two nanospheres is considered in determining the loading amount of the nanosphere. The SEM images of the nanohybrids supports this assumption.

2) The mass density of graphene is  $7.6 \times 10^{-8} \text{ g cm}^{-2}$ .

3) All nanospheres are well positioned between graphene layers.
